# Supplementary material for: Cost-Effectiveness Analysis of COVID-19 Vaccine Booster Dose in the Thai Setting during the Period of Omicron Variant Predominance
Source: MDPI journal article supplement (doi:10.3390/tropicalmed8020091), 2023-01-30
Supplement: s1 [file s1]

model d2p v13.stmx

|            |       |                          |
|------------|-------|--------------------------|
| Total      | Count | Including Array Elements |
| Variables  | 173   | 326                      |
| Stocks     | 36    | 81                       |
| Flows      | 33    | 96                       |
| Converters | 104   | 149                      |
| Constants  | 64    | 130                      |
| Equations  | 73    | 115                      |
| Graphicals | 0     | 0                        |

|                                                        | Equation                                                                                                                            | Properties                                                                                                                                                                                                      | Units | Documentation | Annotation   |
|--------------------------------------------------------|-------------------------------------------------------------------------------------------------------------------------------------|-----------------------------------------------------------------------------------------------------------------------------------------------------------------------------------------------------------------|-------|---------------|--------------|
| Top-Level Model:                                       |                                                                                                                                     |                                                                                                                                                                                                                 |       |               |              |
| cum_vac_3_doses_additional_base(t)                     | cum_vac_3_doses_additional_base(t - dt) + (Flow_10) * dt                                                                            | INIT cum_vac_3_doses_additional_base = 0                                                                                                                                                                        |       |               | NON-NEGATIVE |
| cum_vac_3_doses_additional_mRNA_scenario(t)            | cum_vac_3_doses_additional_mRNA_scenario(t - dt) + (Flow_29) * dt                                                                   | INIT cum_vac_3_doses_additional_mRNA_scenario = 0                                                                                                                                                               |       |               | NON-NEGATIVE |
| cum_vac_3_doses_additional_vv_scenario(t)              | cum_vac_3_doses_additional_vv_scenario(t - dt) + (Flow_12) * dt                                                                     | INIT cum_vac_3_doses_additional_vv_scenario = 0                                                                                                                                                                 |       |               | NON-NEGATIVE |
| cumulative_reported_cases_cases(severity)(t)           | cumulative_reported_cases_cases(severity)(t - dt) + (daily_reported_cases_by_severity(severity)) * dt                               | INIT cumulative_reported_cases_cases(severity) = 0                                                                                                                                                              |       |               | NON-NEGATIVE |
| cumulative_reported_cases_cases_1(severity)(t)         | cumulative_reported_cases_cases_1(severity)(t - dt) + (daily_reported_cases_by_severity_1(severity)) * dt                           | INIT cumulative_reported_cases_cases_1(severity) = 0                                                                                                                                                            |       |               | NON-NEGATIVE |
| cumulative_reported_cases_cases_2(severity)(t)         | cumulative_reported_cases_cases_2(severity)(t - dt) + (daily_reported_cases_by_severity_2(severity)) * dt                           | INIT cumulative_reported_cases_cases_2(severity) = 0                                                                                                                                                            |       |               | NON-NEGATIVE |
| E(t)                                                   | E(t - dt) + (flow_1 - Flow_2[mild_asym] - Flow_2[pneumo_no_ETT] - Flow_2[pneumo_ETT_no_dead] - Flow_2[pneumo_ETT_dead]) * dt        | INIT E = 0                                                                                                                                                                                                      |       |               | NON-NEGATIVE |
| E_1(t)                                                 | E_1(t - dt) + (Flow_5 - Flow_6[mild_asym] - Flow_6[pneumo_no_ETT] - Flow_6[pneumo_ETT_no_dead] - Flow_6[pneumo_ETT_dead]) * dt      | INIT E_1 = 0                                                                                                                                                                                                    |       |               | NON-NEGATIVE |
| E_2(t)                                                 | E_2(t - dt) + (flow_11 - Flow_13[mild_asym] - Flow_13[pneumo_no_ETT] - Flow_13[pneumo_ETT_no_dead] - Flow_13[pneumo_ETT_dead]) * dt | INIT E_2 = 0                                                                                                                                                                                                    |       |               | NON-NEGATIVE |
| E_3(t)                                                 | E_3(t - dt) + (Flow_16 - Flow_17[mild_asym] - Flow_17[pneumo_no_ETT] - Flow_17[pneumo_ETT_no_dead] - Flow_17[pneumo_ETT_dead]) * dt | INIT E_3 = 0                                                                                                                                                                                                    |       |               | NON-NEGATIVE |
| E_4(t)                                                 | E_4(t - dt) + (flow_20 - Flow_22[mild_asym] - Flow_22[pneumo_no_ETT] - Flow_22[pneumo_ETT_no_dead] - Flow_22[pneumo_ETT_dead]) * dt | INIT E_4 = 0                                                                                                                                                                                                    |       |               | NON-NEGATIVE |
| E_5(t)                                                 | E_5(t - dt) + (Flow_25 - Flow_26[mild_asym] - Flow_26[pneumo_no_ETT] - Flow_26[pneumo_ETT_no_dead] - Flow_26[pneumo_ETT_dead]) * dt | INIT E_5 = 0                                                                                                                                                                                                    |       |               | NON-NEGATIVE |
| I_after(severity)(t)                                   | I_after(severity)(t - dt) + (Flow_3[severity] - Flow_4[severity]) * dt                                                              | INIT I_after(severity) = 0<br>TRANSIT TIME = admission_time<br>CONTINUOUS<br>ACCEPT MULTIPLE BATCHES                                                                                                            |       |               | CONVEYOR     |
| I_after_1(severity)(t)                                 | I_after_1(severity)(t - dt) + (Flow_7[severity] - Flow_8[severity]) * dt                                                            | INIT I_after_1(severity) = 0<br>TRANSIT TIME = 1<br>CONTINUOUS<br>ACCEPT MULTIPLE BATCHES                                                                                                                       |       |               | CONVEYOR     |
| I_after_2(severity)(t)                                 | I_after_2(severity)(t - dt) + (Flow_14[severity] - Flow_15[severity]) * dt                                                          | INIT I_after_2(severity) = 0<br>TRANSIT TIME = admission_time_1<br>CONTINUOUS<br>ACCEPT MULTIPLE BATCHES                                                                                                        |       |               | CONVEYOR     |
| I_after_3(severity)(t)                                 | I_after_3(severity)(t - dt) + (Flow_18[severity] - Flow_19[severity]) * dt                                                          | INIT I_after_3(severity) = 0<br>TRANSIT TIME = 1<br>CONTINUOUS<br>ACCEPT MULTIPLE BATCHES                                                                                                                       |       |               | CONVEYOR     |
| I_after_4(severity)(t)                                 | I_after_4(severity)(t - dt) + (Flow_23[severity] - Flow_24[severity]) * dt                                                          | INIT I_after_4(severity) = 0<br>TRANSIT TIME = admission_time_2<br>CONTINUOUS<br>ACCEPT MULTIPLE BATCHES                                                                                                        |       |               | CONVEYOR     |
| I_after_5(severity)(t)                                 | I_after_5(severity)(t - dt) + (Flow_27[severity] - Flow_28[severity]) * dt                                                          | INIT I_after_5(severity) = 0<br>TRANSIT TIME = 1<br>CONTINUOUS<br>ACCEPT MULTIPLE BATCHES                                                                                                                       |       |               | CONVEYOR     |
| I_before(severity)(t)                                  | I_before(severity)(t - dt) + (Flow_2[severity] - Flow_3[severity]) * dt                                                             | INIT I_before(severity) = total_pop*pet_infectious_all_starting*(1-pct_vac_3_doses_starting)*pct_severity_vac_less_than_3_doses<br>TRANSIT TIME = time_lag<br>CONTINUOUS<br>ACCEPT MULTIPLE BATCHES             |       |               | CONVEYOR     |
| I_before_1(severity)(t)                                | I_before_1(severity)(t - dt) + (Flow_6[severity] - Flow_7[severity]) * dt                                                           | INIT I_before_1(severity) = total_pop*pet_severity_vac_3_more_doses*pet_infectious_all_starting*pet_vac_3_doses_starting<br>TRANSIT TIME = time_lag<br>CONTINUOUS<br>ACCEPT MULTIPLE BATCHES                    |       |               | CONVEYOR     |
| I_before_2(severity)(t)                                | I_before_2(severity)(t - dt) + (Flow_13[severity] - Flow_14[severity]) * dt                                                         | INIT I_before_2(severity) = total_pop_1*pet_infectious_all_starting_1*(1-pct_vac_3_doses_starting_1)*pet_severity_vac_less_than_3_doses_1<br>TRANSIT TIME = time_lag_1<br>CONTINUOUS<br>ACCEPT MULTIPLE BATCHES |       |               | CONVEYOR     |
| I_before_3(severity)(t)                                | I_before_3(severity)(t - dt) + (Flow_17[severity] - Flow_18[severity]) * dt                                                         | INIT I_before_3(severity) = total_pop_1*pet_severity_vac_3_more_doses_1*pet_infectious_all_starting_1*pet_vac_3_doses_starting_1<br>TRANSIT TIME = time_lag_1<br>CONTINUOUS<br>ACCEPT MULTIPLE BATCHES          |       |               | CONVEYOR     |
| I_before_4(severity)(t)                                | I_before_4(severity)(t - dt) + (Flow_22[severity] - Flow_23[severity]) * dt                                                         | INIT I_before_4(severity) = total_pop_2*pet_infectious_all_starting_2*(1-pct_vac_3_doses_starting_2)*pet_severity_vac_less_than_3_doses_2<br>TRANSIT TIME = time_lag_2<br>CONTINUOUS<br>ACCEPT MULTIPLE BATCHES |       |               | CONVEYOR     |
| I_before_5(severity)(t)                                | I_before_5(severity)(t - dt) + (Flow_26[severity] - Flow_27[severity]) * dt                                                         | INIT I_before_5(severity) = total_pop_2*pet_severity_vac_3_more_doses_2*pet_infectious_all_starting_2*pet_vac_3_doses_starting_2<br>TRANSIT TIME = time_lag_2<br>CONTINUOUS<br>ACCEPT MULTIPLE BATCHES          |       |               | CONVEYOR     |
| Removed(t)                                             | Removed(t - dt) + (Flow_4[mild_asym] + Flow_4[pneumo_no_ETT] + Flow_4[pneumo_ETT_no_dead] + Flow_4[pneumo_ETT_dead]) * dt           | INIT Removed = 0                                                                                                                                                                                                |       |               | NON-NEGATIVE |
| Removed_1(t)                                           | Removed_1(t - dt) + (Flow_8[mild_asym] + Flow_8[pneumo_no_ETT] + Flow_8[pneumo_ETT_no_dead] + Flow_8[pneumo_ETT_dead]) * dt         | INIT Removed_1 = 0                                                                                                                                                                                              |       |               | NON-NEGATIVE |
| Removed_2(t)                                           | Removed_2(t - dt) + (Flow_15[mild_asym] + Flow_15[pneumo_no_ETT] + Flow_15[pneumo_ETT_no_dead] + Flow_15[pneumo_ETT_dead]) * dt     | INIT Removed_2 = 0                                                                                                                                                                                              |       |               | NON-NEGATIVE |
| Removed_3(t)                                           | Removed_3(t - dt) + (Flow_19[mild_asym] + Flow_19[pneumo_no_ETT] + Flow_19[pneumo_ETT_no_dead] + Flow_19[pneumo_ETT_dead]) * dt     | INIT Removed_3 = 0                                                                                                                                                                                              |       |               | NON-NEGATIVE |
| Removed_4(t)                                           | Removed_4(t - dt) + (Flow_24[mild_asym] + Flow_24[pneumo_no_ETT] + Flow_24[pneumo_ETT_no_dead] + Flow_24[pneumo_ETT_dead]) * dt     | INIT Removed_4 = 0                                                                                                                                                                                              |       |               | NON-NEGATIVE |
| Removed_5(t)                                           | Removed_5(t - dt) + (Flow_28[mild_asym] + Flow_28[pneumo_no_ETT] + Flow_28[pneumo_ETT_no_dead] + Flow_28[pneumo_ETT_dead]) * dt     | INIT Removed_5 = 0                                                                                                                                                                                              |       |               | NON-NEGATIVE |
| S(t)                                                   | S(t - dt) + (- flow_1 - vac_rate) * dt                                                                                              | INIT S = Suscep_all_starting*(1-pct_vac_3_doses_starting)                                                                                                                                                       |       |               | NON-NEGATIVE |
| S_1(t)                                                 | S_1(t - dt) + (vac_rate - Flow_5) * dt                                                                                              | INIT S_1 = Suscep_all_starting*pet_vac_3_doses_starting                                                                                                                                                         |       |               | NON-NEGATIVE |
| S_2(t)                                                 | S_2(t - dt) + (- flow_11 - vac_rate_vv) * dt                                                                                        | INIT S_2 = Suscep_all_starting_1*(1-pct_vac_3_doses_starting_1)                                                                                                                                                 |       |               | NON-NEGATIVE |
| S_3(t)                                                 | S_3(t - dt) + (vac_rate_vv - Flow_16) * dt                                                                                          | INIT S_3 = Suscep_all_starting_1*pet_vac_3_doses_starting_1                                                                                                                                                     |       |               | NON-NEGATIVE |
| S_4(t)                                                 | S_4(t - dt) + (- flow_20 - vac_rate_mRNA) * dt                                                                                      | INIT S_4 = Suscep_all_starting_2*(1-pct_vac_3_doses_starting_2)                                                                                                                                                 |       |               | NON-NEGATIVE |
| S_5(t)                                                 | S_5(t - dt) + (vac_rate_mRNA - Flow_25) * dt                                                                                        | INIT S_5 = Suscep_all_starting_2*pet_vac_3_doses_starting_2                                                                                                                                                     |       |               | NON-NEGATIVE |
| daily_reported_cases_by_severity[mild_asym]            | (Flow_3[mild_asym]+Flow_7[mild_asym])*underreporting_factor_mild_asym                                                               |                                                                                                                                                                                                                 |       |               | UNIFLOW      |
| daily_reported_cases_by_severity[pneumo_no_ETT]        | (Flow_3[pneumo_no_ETT]+Flow_7[pneumo_no_ETT])*underreporting_factor_pneumonia_no_ett                                                |                                                                                                                                                                                                                 |       |               |              |
| daily_reported_cases_by_severity[pneumo_ETT_no_dead]   | (Flow_3[pneumo_ETT_no_dead]+Flow_7[pneumo_ETT_no_dead])*underreporting_factor_pneumonia_ett_NO_death                                |                                                                                                                                                                                                                 |       |               |              |
| daily_reported_cases_by_severity[pneumo_ETT_dead]      | (Flow_3[pneumo_ETT_dead]+Flow_7[pneumo_ETT_dead])*underreporting_factor_pneumonia_ett_death                                         |                                                                                                                                                                                                                 |       |               |              |
| daily_reported_cases_by_severity_1[mild_asym]          | (Flow_14[mild_asym]+Flow_18[mild_asym])*underreporting_factor_mild_asym_1                                                           |                                                                                                                                                                                                                 |       |               | UNIFLOW      |
| daily_reported_cases_by_severity_1[pneumo_no_ETT]      | (Flow_14[pneumo_no_ETT]+Flow_18[pneumo_no_ETT])*underreporting_factor_pneumonia_no_ett_1                                            |                                                                                                                                                                                                                 |       |               |              |
| daily_reported_cases_by_severity_1[pneumo_ETT_no_dead] | (Flow_14[pneumo_ETT_no_dead]+Flow_18[pneumo_ETT_no_dead])*underreporting_factor_pneumonia_ett_NO_death_1                            |                                                                                                                                                                                                                 |       |               |              |
| daily_reported_cases_by_severity_1[pneumo_ETT_dead]    | (Flow_14[pneumo_ETT_dead]+Flow_18[pneumo_ETT_dead])*underreporting_factor_pneumonia_ett_death_1                                     |                                                                                                                                                                                                                 |       |               |              |
| daily_reported_cases_by_severity_2[mild_asym]          | (Flow_23[mild_asym]+Flow_27[mild_asym])*underreporting_factor_mild_asym_2                                                           |                                                                                                                                                                                                                 |       |               | UNIFLOW      |
| daily_reported_cases_by_severity_2[pneumo_no_ETT]      | (Flow_23[pneumo_no_ETT]+Flow_27[pneumo_no_ETT])*underreporting_factor_pneumonia_no_ett_2                                            |                                                                                                                                                                                                                 |       |               |              |
| daily_reported_cases_by_severity_2[pneumo_ETT_no_dead] | (Flow_23[pneumo_ETT_no_dead]+Flow_27[pneumo_ETT_no_dead])*underreporting_factor_pneumonia_ett_NO_death_2                            |                                                                                                                                                                                                                 |       |               |              |
| daily_reported_cases_by_severity_2[pneumo_ETT_dead]    | (Flow_23[pneumo_ETT_dead]+Flow_27[pneumo_ETT_dead])*underreporting_factor_pneumonia_ett_death_2                                     |                                                                                                                                                                                                                 |       |               |              |
| flow_1                                                 | S*1_before_all*(reproduction_number/infectious_duration)*(1~ve<_3_doses)*total_pop                                                  | OUTFLOW PRIORITY: 1                                                                                                                                                                                             |       |               | UNIFLOW      |
| Flow_10                                                | vac_rate                                                                                                                            |                                                                                                                                                                                                                 |       |               | UNIFLOW      |
| flow_11                                                | S_2*1_before_all_1*(reproduction_number_1/infectious_duration_1)*(1~ve<_3_doses_1)*total_pop_1                                      | OUTFLOW PRIORITY: 1                                                                                                                                                                                             |       |               | UNIFLOW      |
| Flow_12                                                | vac_rate_vv                                                                                                                         |                                                                                                                                                                                                                 |       |               | UNIFLOW      |
| Flow_13[severity]                                      | E_2*pet_severity_vac_less_than_3_doses_1/inc_period                                                                                 |                                                                                                                                                                                                                 |       |               | UNIFLOW      |
| Flow_14[severity]                                      | CONVEYOR OUTFLOW                                                                                                                    |                                                                                                                                                                                                                 |       |               |              |
| Flow_15[severity]                                      | CONVEYOR OUTFLOW                                                                                                                    |                                                                                                                                                                                                                 |       |               |              |
| Flow_16                                                | (1~ve>=_3_doses_1)**(reproduction_number_1/infectious_duration)*S_3*1_before_all_1/total_pop_1                                      |                                                                                                                                                                                                                 |       |               | UNIFLOW      |
| Flow_17[severity]                                      | E_3*pet_severity_vac_3_more_doses_1/inc_period                                                                                      |                                                                                                                                                                                                                 |       |               | UNIFLOW      |
| Flow_18[severity]                                      | CONVEYOR OUTFLOW                                                                                                                    |                                                                                                                                                                                                                 |       |               |              |

|                                                          |                                                                                                            |                     |  |  |                   |
|----------------------------------------------------------|------------------------------------------------------------------------------------------------------------|---------------------|--|--|-------------------|
| Flow_19[severity]                                        | CONVEYOR OUTFLOW                                                                                           |                     |  |  |                   |
| Flow_2[severity]                                         | E*pet_severity_vac_less_than_3_doses/inc_period                                                            |                     |  |  | UNIFLOW           |
| flow_20                                                  | S_4*(1_before_all_2*(reproduction_number_2/infectious_duration)*(1-~ve_<_3_doses_2)*total_pop_2            | OUTFLOW PRIORITY: 1 |  |  | UNIFLOW           |
| Flow_22[severity]                                        | E_4*pet_severity_vac_less_than_3_doses_2/inc_period                                                        |                     |  |  | UNIFLOW           |
| Flow_23[severity]                                        | CONVEYOR OUTFLOW                                                                                           |                     |  |  |                   |
| Flow_24[severity]                                        | CONVEYOR OUTFLOW                                                                                           |                     |  |  |                   |
| Flow_25                                                  | (1-~ve_>= _3_doses_2)*(reproduction_number_2/infectious_duration)*S_5*1_before_all_2*total_pop_2           |                     |  |  | UNIFLOW           |
| Flow_26[severity]                                        | E_5*pet_severity_vac_3_more_doses_2/inc_period                                                             |                     |  |  | UNIFLOW           |
| Flow_27[severity]                                        | CONVEYOR OUTFLOW                                                                                           |                     |  |  |                   |
| Flow_28[severity]                                        | CONVEYOR OUTFLOW                                                                                           |                     |  |  |                   |
| Flow_29                                                  | vac_rate_mRNA                                                                                              |                     |  |  | UNIFLOW           |
| Flow_3[severity]                                         | CONVEYOR OUTFLOW                                                                                           |                     |  |  |                   |
| Flow_4[severity]                                         | CONVEYOR OUTFLOW                                                                                           |                     |  |  |                   |
| Flow_5                                                   | (1-~ve_>= _3_doses)*(reproduction_number/infectious_duration)*S_1*1_before_all*total_pop                   |                     |  |  | UNIFLOW           |
| Flow_6[severity]                                         | E_1*pet_severity_vac_3_more_doses/inc_period                                                               |                     |  |  | UNIFLOW           |
| Flow_7[severity]                                         | CONVEYOR OUTFLOW                                                                                           |                     |  |  |                   |
| Flow_8[severity]                                         | CONVEYOR OUTFLOW                                                                                           |                     |  |  |                   |
| vac_rate                                                 | 0                                                                                                          | OUTFLOW PRIORITY: 2 |  |  | UNIFLOW           |
| vac_rate_mRNA                                            | STEP(171300, 1)                                                                                            | OUTFLOW PRIORITY: 2 |  |  | UNIFLOW           |
| vac_rate_vv                                              | STEP(171300, 1)                                                                                            | OUTFLOW PRIORITY: 2 |  |  | UNIFLOW           |
| admin_cost_and_storage                                   | 234                                                                                                        |                     |  |  |                   |
| admin_cost_and_storage_1                                 | 234                                                                                                        |                     |  |  |                   |
| admin_cost_and_storage_2                                 | 234                                                                                                        |                     |  |  |                   |
| admission_time[mild_asym]                                | 10                                                                                                         |                     |  |  |                   |
| admission_time[pneumo_no_ETT]                            | 14                                                                                                         |                     |  |  |                   |
| admission_time[pneumo_ETT_no_dead]                       | 21                                                                                                         |                     |  |  |                   |
| admission_time[pneumo_ETT_dead]                          | 21                                                                                                         |                     |  |  |                   |
| admission_time_1[mild_asym]                              | 10                                                                                                         |                     |  |  |                   |
| admission_time_1[pneumo_no_ETT]                          | 14                                                                                                         |                     |  |  |                   |
| admission_time_1[pneumo_ETT_no_dead]                     | 21                                                                                                         |                     |  |  |                   |
| admission_time_1[pneumo_ETT_dead]                        | 21                                                                                                         |                     |  |  |                   |
| admission_time_2[mild_asym]                              | 10                                                                                                         |                     |  |  |                   |
| admission_time_2[pneumo_no_ETT]                          | 14                                                                                                         |                     |  |  |                   |
| admission_time_2[pneumo_ETT_no_dead]                     | 21                                                                                                         |                     |  |  |                   |
| admission_time_2[pneumo_ETT_dead]                        | 21                                                                                                         |                     |  |  |                   |
| cum_ALL_cases_base                                       | SUM(cumulative_reported_cases_cases)                                                                       |                     |  |  |                   |
| cum_ALL_cases_mRNA                                       | SUM(cumulative_reported_cases_cases_2)                                                                     |                     |  |  |                   |
| cum_ALL_cases_vv                                         | SUM(cumulative_reported_cases_cases_1)                                                                     |                     |  |  |                   |
| cum_Death_base                                           | cumulative_reported_cases_cases[pneumo_ETT_dead]                                                           |                     |  |  |                   |
| cum_Death_mRNA                                           | cumulative_reported_cases_cases_2[pneumo_ETT_dead]                                                         |                     |  |  |                   |
| cum_Death_vv                                             | cumulative_reported_cases_cases_1[pneumo_ETT_dead]                                                         |                     |  |  |                   |
| cum_Rx_cost_cases_base                                   | SUM(total_Rx_cost_by_severity)                                                                             |                     |  |  |                   |
| cum_Rx_cost_cases_mRNA                                   | SUM(total_Rx_cost_by_severity_2)                                                                           |                     |  |  |                   |
| cum_Rx_cost_cases_vv                                     | SUM(total_Rx_cost_by_severity_1)                                                                           |                     |  |  |                   |
| cum_Rx_cost_death_base                                   | total_Rx_cost_by_severity[pneumo_ETT_dead]*cum_Death_base                                                  |                     |  |  |                   |
| cum_Rx_cost_death_mRNA                                   | total_Rx_cost_by_severity_2[pneumo_ETT_dead]*cum_Death_mRNA                                                |                     |  |  |                   |
| cum_Rx_cost_death_vv                                     | total_Rx_cost_by_severity_1[pneumo_ETT_dead]*cum_Death_vv                                                  |                     |  |  |                   |
| daily_death                                              | daily_reported_cases_by_severity[pneumo_ETT_dead]                                                          |                     |  |  |                   |
| daily_death_1                                            | daily_reported_cases_by_severity_1[pneumo_ETT_dead]                                                        |                     |  |  |                   |
| daily_death_2                                            | daily_reported_cases_by_severity_2[pneumo_ETT_dead]                                                        |                     |  |  |                   |
| daily_reported_cases_ALL_base                            | SUM(daily_reported_cases_by_severity)                                                                      |                     |  |  |                   |
| daily_reported_cases_ALL_mRNA                            | SUM(daily_reported_cases_by_severity_2)                                                                    |                     |  |  |                   |
| daily_reported_cases_ALL_vv                              | SUM(daily_reported_cases_by_severity_1)                                                                    |                     |  |  |                   |
| 1_before_all                                             | 1_before[mild_asym] + 1_before_1[mild_asym]                                                                |                     |  |  | SUMMING CONVERTER |
| 1_before_all_1                                           | 1_before_2[mild_asym] + 1_before_3[mild_asym]                                                              |                     |  |  | SUMMING CONVERTER |
| 1_before_all_2                                           | 1_before_4[mild_asym] + 1_before_5[mild_asym]                                                              |                     |  |  | SUMMING CONVERTER |
| ICER_total_cost_per_cases_saved_BASE_vs_mRNA             | IF TIME < 2 THEN 0 ELSE "incremental_total_cost_(mRNA-basE)"/"incremental_total_cases_saved_(base_-_mRNA)" |                     |  |  |                   |
| ICER_total_cost_per_cases_saved_BASE_vs_VV               | IF TIME < 2 THEN 0 ELSE "incremental_total_cost_(vv-basE)"/"incremental_total_cases_saved_(base_-_vv)"     |                     |  |  |                   |
| ICER_total_cost_per_death_saved_BASE_vs_mRNA             | IF TIME < 2 THEN 0 ELSE "incremental_total_cost_(mRNA-basE)"/"incremental_total_death_saved_(base_-_mRNA)" |                     |  |  |                   |
| ICER_total_cost_per_death_saved_BASE_vs_VV               | IF TIME < 2 THEN 0 ELSE "incremental_total_cost_(vv-basE)"/"incremental_total_death_saved_(base-vv)"       |                     |  |  |                   |
| ICER_vac_cost_per_cases_save_BASE_vs_mRNA                | IF TIME < 2 THEN 0 ELSE margin_vac_3_cost_mRNA*"incremental_total_cases_saved_(base_-_mRNA)"               |                     |  |  |                   |
| ICER_vac_cost_per_cases_save_BASE_vs_VV                  | IF TIME < 2 THEN 0 ELSE margin_vac_3_cost_vv*"incremental_total_cases_saved_(base_-_vv)"                   |                     |  |  |                   |
| ICER_vac_cost_per_death_save_BASE_vs_mRNA                | IF TIME < 2 THEN 0 ELSE margin_vac_3_cost_mRNA*"incremental_total_death_saved_(base_-_mRNA)"               |                     |  |  |                   |
| ICER_vac_cost_per_death_save_BASE_vs_VV                  | IF TIME < 2 THEN 0 ELSE margin_vac_3_cost_vv*"incremental_total_death_saved_(base-vv)"                     |                     |  |  |                   |
| inc_period                                               | 3.5                                                                                                        |                     |  |  |                   |
| "incremental_total_cases_saved_(base_-_mRNA)"            | cum_ALL_cases_base-cum_ALL_cases_mRNA                                                                      |                     |  |  |                   |
| "incremental_total_cases_saved_(base_-_vv)"              | cum_ALL_cases_base-cum_ALL_cases_vv                                                                        |                     |  |  |                   |
| "incremental_total_cost_(mRNA-basE)"                     | cum_Rx_cost_cases_mRNA+total_third_dose_vac_mRNA-(cum_Rx_cost_cases_base+total_third_dose_vac_cost_BASE)   |                     |  |  |                   |
| "incremental_total_cost_(vv-basE)"                       | total_third_dose_vac_cost_vv+cum_Rx_cost_cases_vv-(cum_Rx_cost_cases_base+total_third_dose_vac_cost_BASE)  |                     |  |  |                   |
| "incremental_total_death_saved_(base_-_mRNA)"            | cum_Death_base-cum_Death_mRNA                                                                              |                     |  |  |                   |
| "incremental_total_death_saved_(base-vv)"                | cum_Death_base-cum_Death_vv                                                                                |                     |  |  |                   |
| infectious_duration                                      | 4.7                                                                                                        |                     |  |  |                   |
| logOR_base                                               | -0.580732                                                                                                  |                     |  |  |                   |
| logOR_mRNA                                               | -0.798307                                                                                                  |                     |  |  |                   |
| logOR_vv                                                 | -0.417149                                                                                                  |                     |  |  |                   |
| margin_cum_vac_3_doses_mRNA_base                         | cum_vac_3_doses_additional_mRNA_scenario-cum_vac_3_doses_additional_base                                   |                     |  |  |                   |
| margin_cum_vac_3_doses_vv_base                           | cum_vac_3_doses_additional_vv_scenario-cum_vac_3_doses_additional_base                                     |                     |  |  |                   |
| margin_vac_3_cost_mRNA                                   | margin_cum_vac_3_doses_mRNA_base*(vial_cost_mRNA+admin_cost_and_storage_2)                                 |                     |  |  |                   |
| margin_vac_3_cost_vv                                     | margin_cum_vac_3_doses_vv_base*(admin_cost_and_storage_1+vial_cost_vv)                                     |                     |  |  |                   |
| pet_infectious_all_starting                              | 0.0025                                                                                                     |                     |  |  |                   |
| pet_infectious_all_starting_1                            | 0.0025                                                                                                     |                     |  |  |                   |
| pet_infectious_all_starting_2                            | 0.0025                                                                                                     |                     |  |  |                   |
| pet_severity_vac_3_more_doses[mild_asym]                 | 0.999487                                                                                                   |                     |  |  |                   |
| pet_severity_vac_3_more_doses[pneumo_no_ETT]             | 0.000466                                                                                                   |                     |  |  |                   |
| pet_severity_vac_3_more_doses[pneumo_ETT_no_dead]        | 0.0000155                                                                                                  |                     |  |  |                   |
| pet_severity_vac_3_more_doses[pneumo_ETT_dead]           | 0.000031                                                                                                   |                     |  |  |                   |
| pet_severity_vac_3_more_doses_1[mild_asym]               | 0.999487+STEP(0.0001890912, 78)                                                                            |                     |  |  |                   |
| pet_severity_vac_3_more_doses_1[pneumo_no_ETT]           | 0.000466+STEP(-0.0001718427, 78)                                                                           |                     |  |  |                   |
| pet_severity_vac_3_more_doses_1[pneumo_ETT_no_dead]      | 0.0000155+STEP(-0.0000057, 78)                                                                             |                     |  |  |                   |
| pet_severity_vac_3_more_doses_1[pneumo_ETT_dead]         | 0.000031+STEP(0.00001145, 78)                                                                              |                     |  |  |                   |
| pet_severity_vac_3_more_doses_2[mild_asym]               | 0.999487+STEP(0.000081, 78)                                                                                |                     |  |  |                   |
| pet_severity_vac_3_more_doses_2[pneumo_no_ETT]           | 0.000466+STEP(0.00007368, 78)                                                                              |                     |  |  |                   |
| pet_severity_vac_3_more_doses_2[pneumo_ETT_no_dead]      | 0.0000155+STEP(0.0000024547, 78)                                                                           |                     |  |  |                   |
| pet_severity_vac_3_more_doses_2[pneumo_ETT_dead]         | 0.000031+STEP(0.0000049, 78)                                                                               |                     |  |  |                   |
| pet_severity_vac_less_than_3_doses[mild_asym]            | 0.99729                                                                                                    |                     |  |  |                   |
| pet_severity_vac_less_than_3_doses[pneumo_no_ETT]        | 0.002463                                                                                                   |                     |  |  |                   |
| pet_severity_vac_less_than_3_doses[pneumo_ETT_no_dead]   | 0.000082                                                                                                   |                     |  |  |                   |
| pet_severity_vac_less_than_3_doses[pneumo_ETT_dead]      | 0.000164                                                                                                   |                     |  |  |                   |
| pet_severity_vac_less_than_3_doses_1[mild_asym]          | 0.99729                                                                                                    |                     |  |  |                   |
| pet_severity_vac_less_than_3_doses_1[pneumo_no_ETT]      | 0.002463                                                                                                   |                     |  |  |                   |
| pet_severity_vac_less_than_3_doses_1[pneumo_ETT_no_dead] | 0.000082                                                                                                   |                     |  |  |                   |
| pet_severity_vac_less_than_3_doses_1[pneumo_ETT_dead]    | 0.000164                                                                                                   |                     |  |  |                   |
| pet_vac_3_doses_starting                                 | 0                                                                                                          |                     |  |  |                   |
| pet_vac_3_doses_starting_1                               | 0.2                                                                                                        |                     |  |  |                   |
| pet_vac_3_doses_starting_2                               | 0.2                                                                                                        |                     |  |  |                   |
| reproduction_number                                      | 1.5                                                                                                        |                     |  |  |                   |
| reproduction_number_1                                    | 1.7                                                                                                        |                     |  |  |                   |
| reproduction_number_2                                    | 1.7                                                                                                        |                     |  |  |                   |
| Suscep_all_starting                                      | total_pop*(1-pet_infectious_all_starting)                                                                  |                     |  |  |                   |
| Suscep_all_starting_1                                    | total_pop_1*(1-pet_infectious_all_starting_1)                                                              |                     |  |  |                   |
| Suscep_all_starting_2                                    | total_pop_2*(1-pet_infectious_all_starting_2)                                                              |                     |  |  |                   |

|                                                        |                                                                         |  |  |  |  |
|--------------------------------------------------------|-------------------------------------------------------------------------|--|--|--|--|
| time_lag                                               | 4                                                                       |  |  |  |  |
| time_lag_1                                             | 4                                                                       |  |  |  |  |
| time_lag_2                                             | 4                                                                       |  |  |  |  |
| total_pop                                              | 50*10^6                                                                 |  |  |  |  |
| total_pop_1                                            | 50*10^6                                                                 |  |  |  |  |
| total_pop_2                                            | 50*10^6                                                                 |  |  |  |  |
| total_Rx_cost_by_severity[severity]                    | unit_cost_for_each_level_of_care*cumulative_reported_cases_cases        |  |  |  |  |
| total_Rx_cost_by_severity_1[severity]                  | unit_cost_for_each_level_of_care_1*cumulative_reported_cases_cases_1    |  |  |  |  |
| total_Rx_cost_by_severity_2[severity]                  | unit_cost_for_each_level_of_care_2*cumulative_reported_cases_cases_2    |  |  |  |  |
| total_third_dose_vac_cost_BASE                         | (admin_cost_and_storage+vial_cost_base)*cum_vac_3_doses_additional_base |  |  |  |  |
| total_third_dose_vac_cost_vv                           | total_third_dose_vac_cost_BASE+margin_vac_3_cost_vv                     |  |  |  |  |
| total_third_dose_vac_mRNA                              | total_third_dose_vac_cost_BASE+margin_vac_3_cost_mRNA                   |  |  |  |  |
| underreporting_factor_mild_asym                        | 0.16667                                                                 |  |  |  |  |
| underreporting_factor_mild_asym_1                      | 0.16667                                                                 |  |  |  |  |
| underreporting_factor_mild_asym_2                      | 0.16667                                                                 |  |  |  |  |
| underreporting_factor_pneumonia_ett_death              | 1                                                                       |  |  |  |  |
| underreporting_factor_pneumonia_ett_death_1            | 1                                                                       |  |  |  |  |
| underreporting_factor_pneumonia_ett_death_2            | 1                                                                       |  |  |  |  |
| underreporting_factor_pneumonia_ett_NO_death           | 1                                                                       |  |  |  |  |
| underreporting_factor_pneumonia_ett_NO_death_1         | 1                                                                       |  |  |  |  |
| underreporting_factor_pneumonia_ett_NO_death_2         | 1                                                                       |  |  |  |  |
| underreporting_factor_pneumonia_no_ett                 | 0.33333                                                                 |  |  |  |  |
| underreporting_factor_pneumonia_no_ett_1               | 0.33333                                                                 |  |  |  |  |
| underreporting_factor_pneumonia_no_ett_2               | 0.33333                                                                 |  |  |  |  |
| unit_cost_for_each_level_of_care[mild_asym]            | 23000                                                                   |  |  |  |  |
| unit_cost_for_each_level_of_care[pneumo_no_ETT]        | 81000                                                                   |  |  |  |  |
| unit_cost_for_each_level_of_care[pneumo_ETT_no_dead]   | 252000                                                                  |  |  |  |  |
| unit_cost_for_each_level_of_care[pneumo_ETT_dead]      | 252000                                                                  |  |  |  |  |
| unit_cost_for_each_level_of_care_1[mild_asym]          | 23000                                                                   |  |  |  |  |
| unit_cost_for_each_level_of_care_1[pneumo_no_ETT]      | 81000                                                                   |  |  |  |  |
| unit_cost_for_each_level_of_care_1[pneumo_ETT_no_dead] | 252000                                                                  |  |  |  |  |
| unit_cost_for_each_level_of_care_1[pneumo_ETT_dead]    | 252000                                                                  |  |  |  |  |
| unit_cost_for_each_level_of_care_2[mild_asym]          | 23000                                                                   |  |  |  |  |
| unit_cost_for_each_level_of_care_2[pneumo_no_ETT]      | 81000                                                                   |  |  |  |  |
| unit_cost_for_each_level_of_care_2[pneumo_ETT_no_dead] | 252000                                                                  |  |  |  |  |
| unit_cost_for_each_level_of_care_2[pneumo_ETT_dead]    | 252000                                                                  |  |  |  |  |
| "ve_<_3_doses"                                         | 0                                                                       |  |  |  |  |
| "ve_<_3_doses_1"                                       | 0                                                                       |  |  |  |  |
| "ve_<_3_doses_2"                                       | 0                                                                       |  |  |  |  |
| "ve_>= _3_doses"                                       | 1-EXP(logOR_base)                                                       |  |  |  |  |
| "ve_>= _3_doses_1"                                     | IF TIME < 78 THEN 1-EXP(logOR_base) ELSE 1-EXP(logOR_vv)                |  |  |  |  |
| "ve_>= _3_doses_2"                                     | IF TIME < 78 THEN 1-EXP(logOR_base) ELSE 1-EXP(logOR_mRNA)              |  |  |  |  |
| vial_cost_base                                         | 457                                                                     |  |  |  |  |
| vial_cost_mRNA                                         | 488                                                                     |  |  |  |  |
| vial_cost_vv                                           | 308                                                                     |  |  |  |  |

|                                      |       |
|--------------------------------------|-------|
| Run Specs                            |       |
| Start Time                           | 1     |
| Stop Time                            | 170   |
| DT                                   | 1/4   |
| Fractional DT                        | True  |
| Save Interval                        | 1     |
| Sim Duration                         | 1.5   |
| Time Units                           | Day   |
| Pause Interval                       | 0     |
| Integration Method                   | Euler |
| Keep all variable results            | True  |
| Run By                               | Run   |
| Calculate loop dominance information | True  |
| Exhaustive Search Threshold          | 1000  |

| Array Dimension | Indexed by | Elements                                                            |
|-----------------|------------|---------------------------------------------------------------------|
| severity        | Label (4)  | mild_asym<br>pneumo_no_ETT<br>pneumo_ETT_no_dead<br>pneumo_ETT_dead |
