# Supplementary material for: Cost-Effectiveness Analysis of COVID-19 Vaccine Booster Dose in the Thai Setting during the Period of Omicron Variant Predominance
Source: MDPI journal article supplement (doi:10.3390/tropicalmed8020091), 2023-01-30

## BASE

< 3 vacs

>= 3 vacs

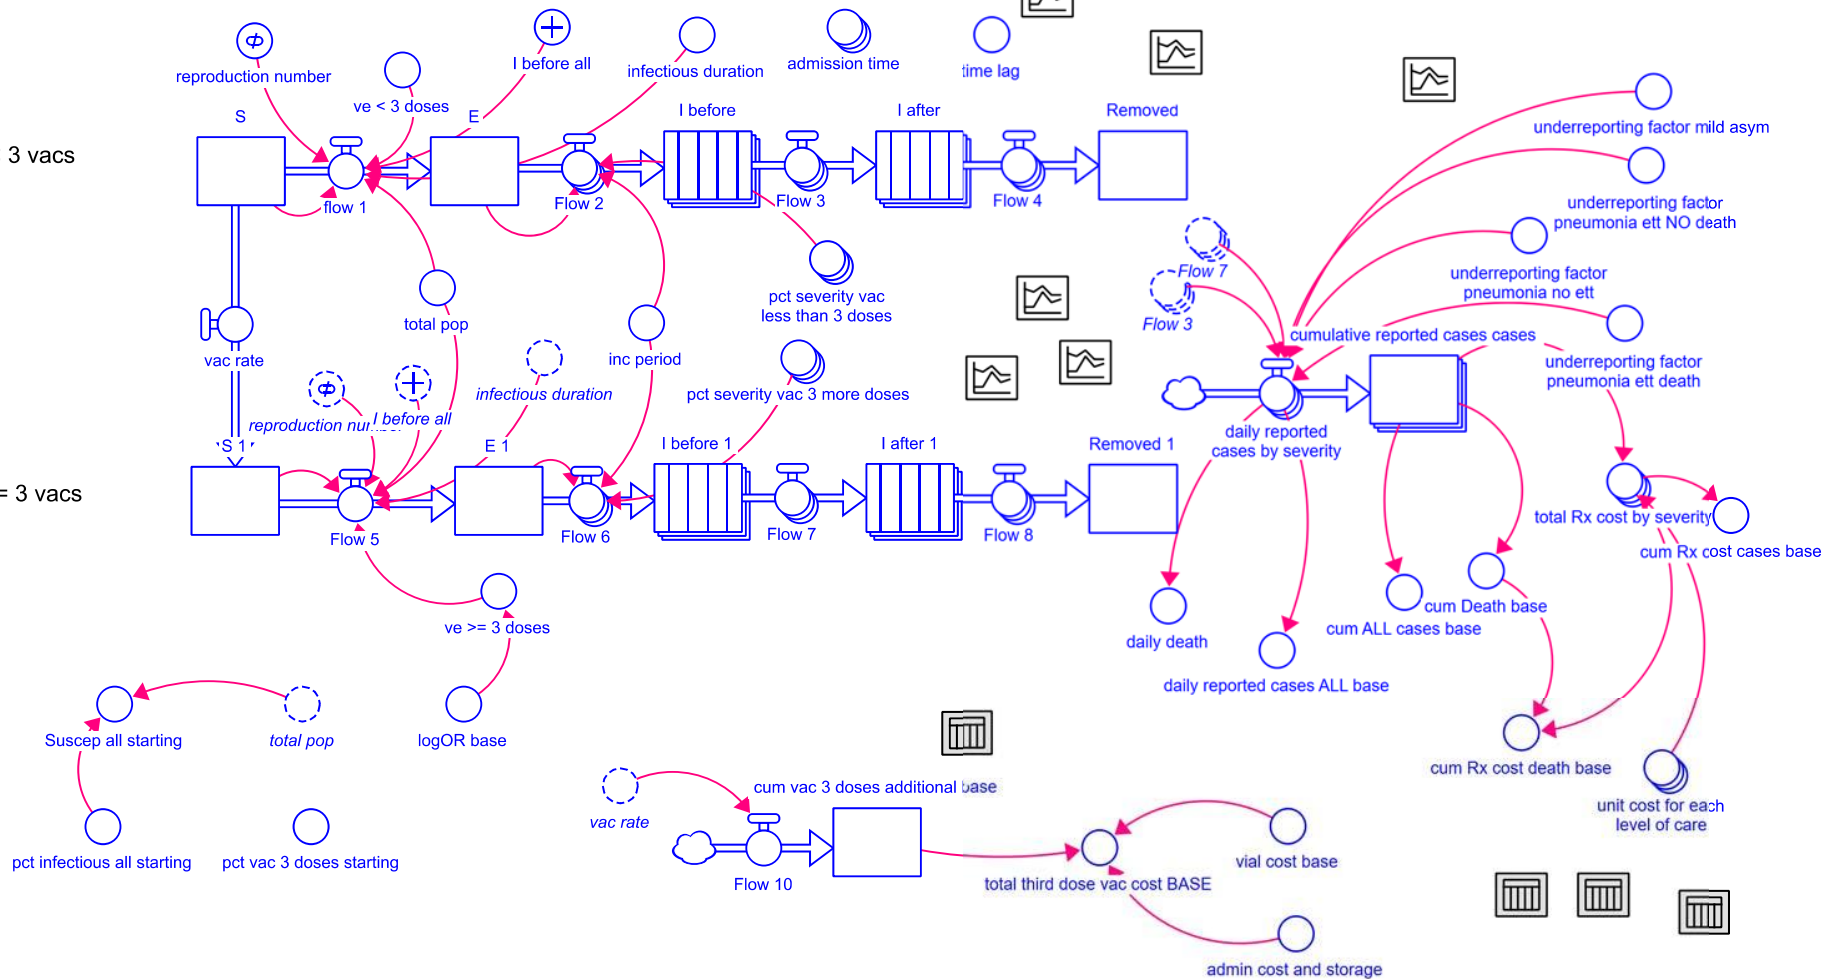

## Viral vector

< 3 vacs

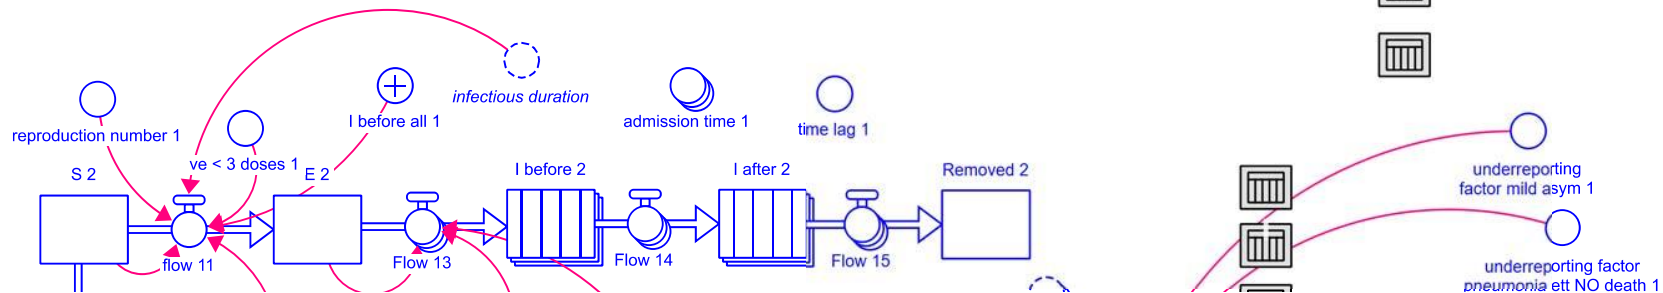

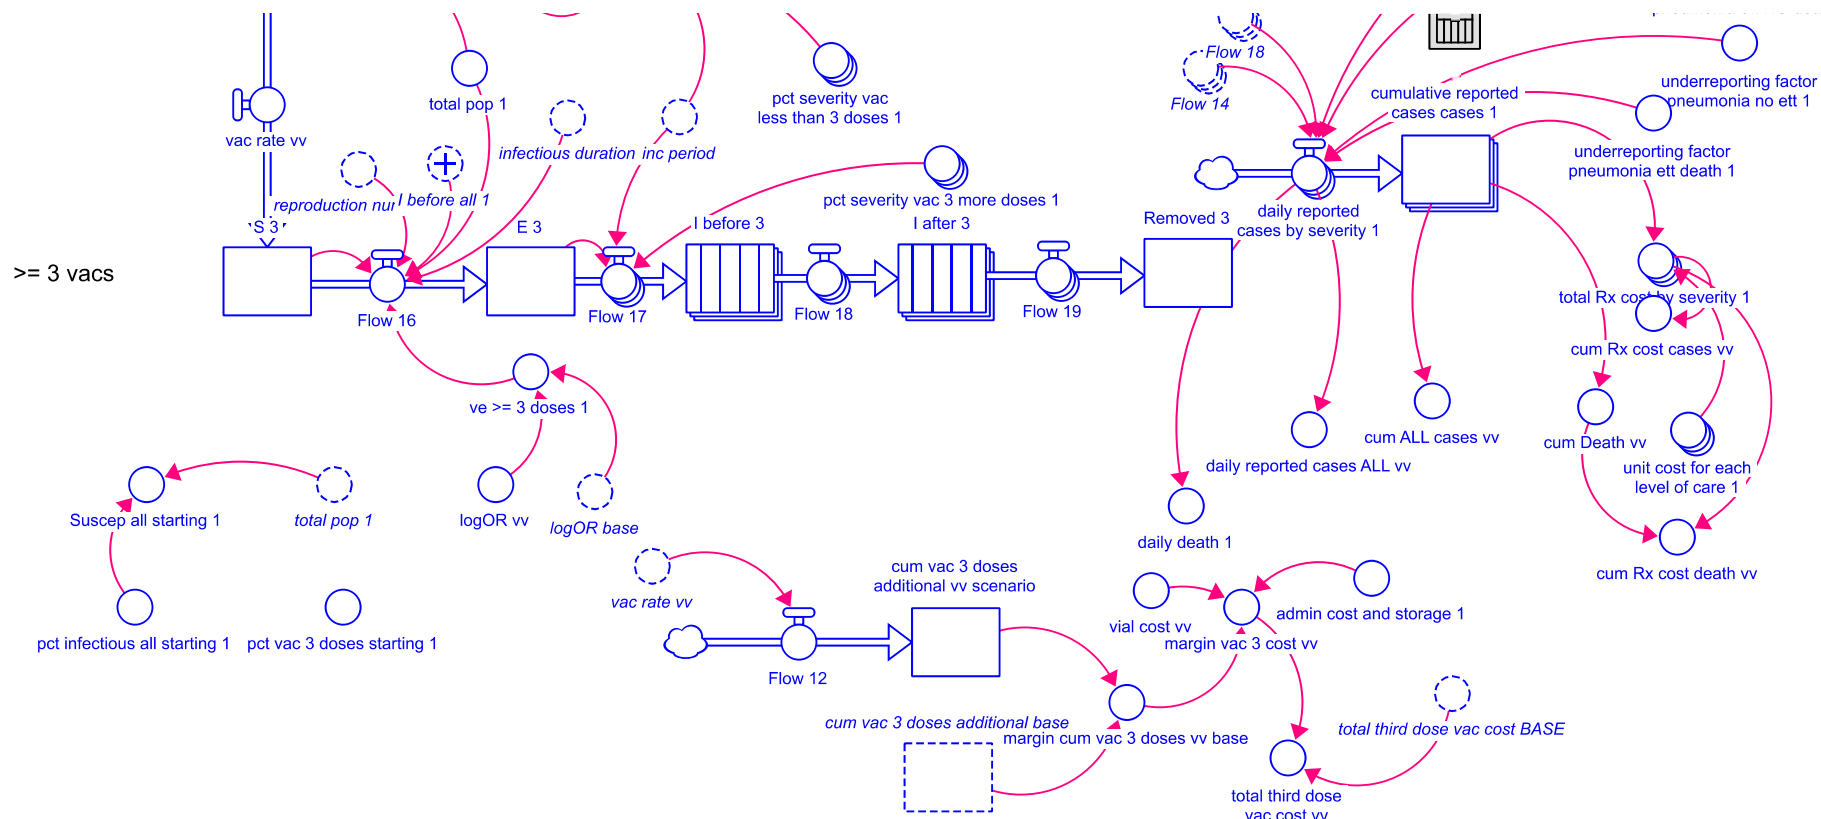

mRNA

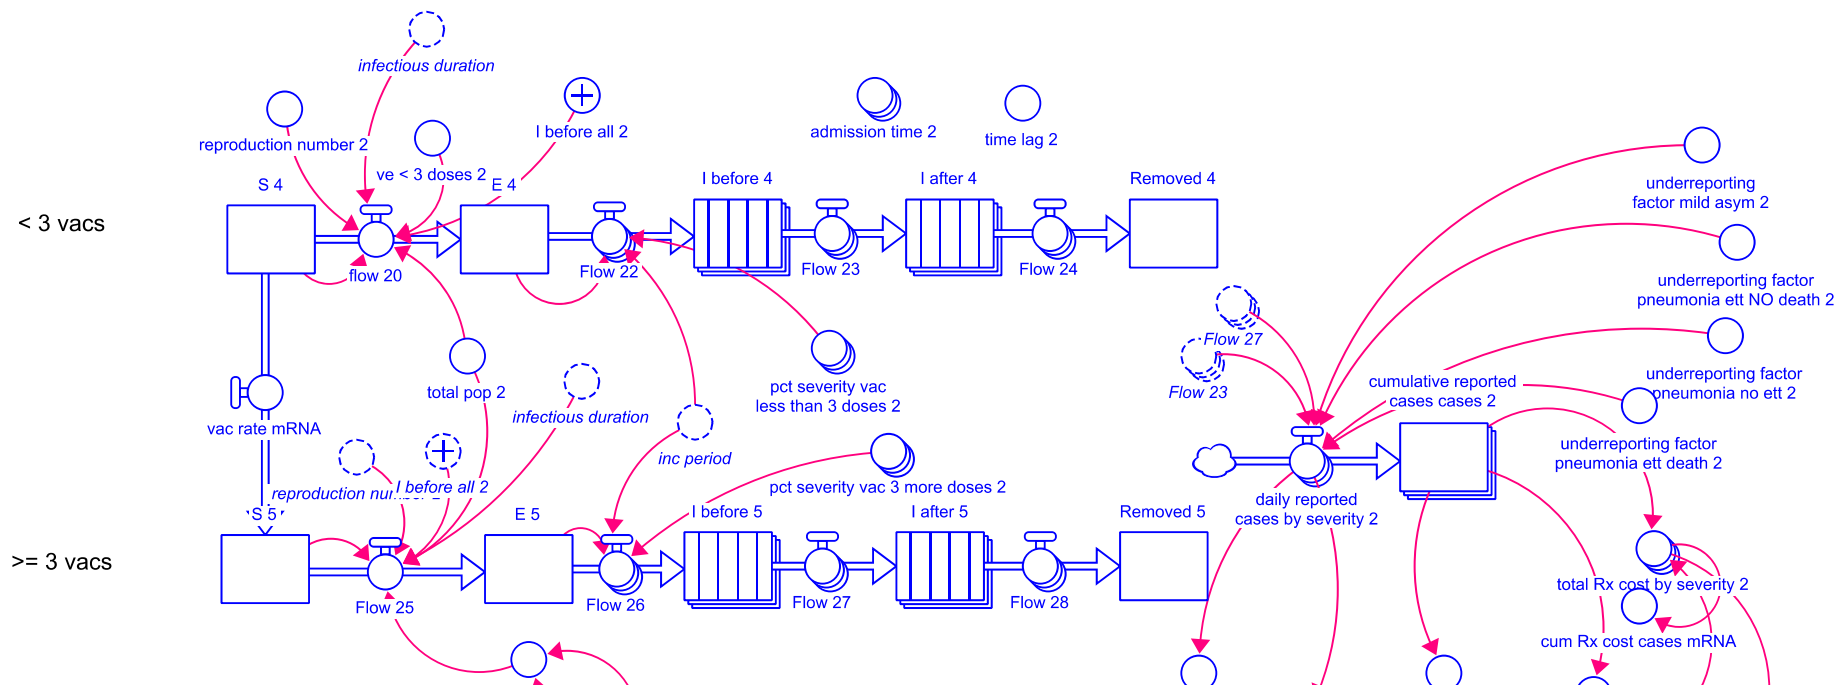

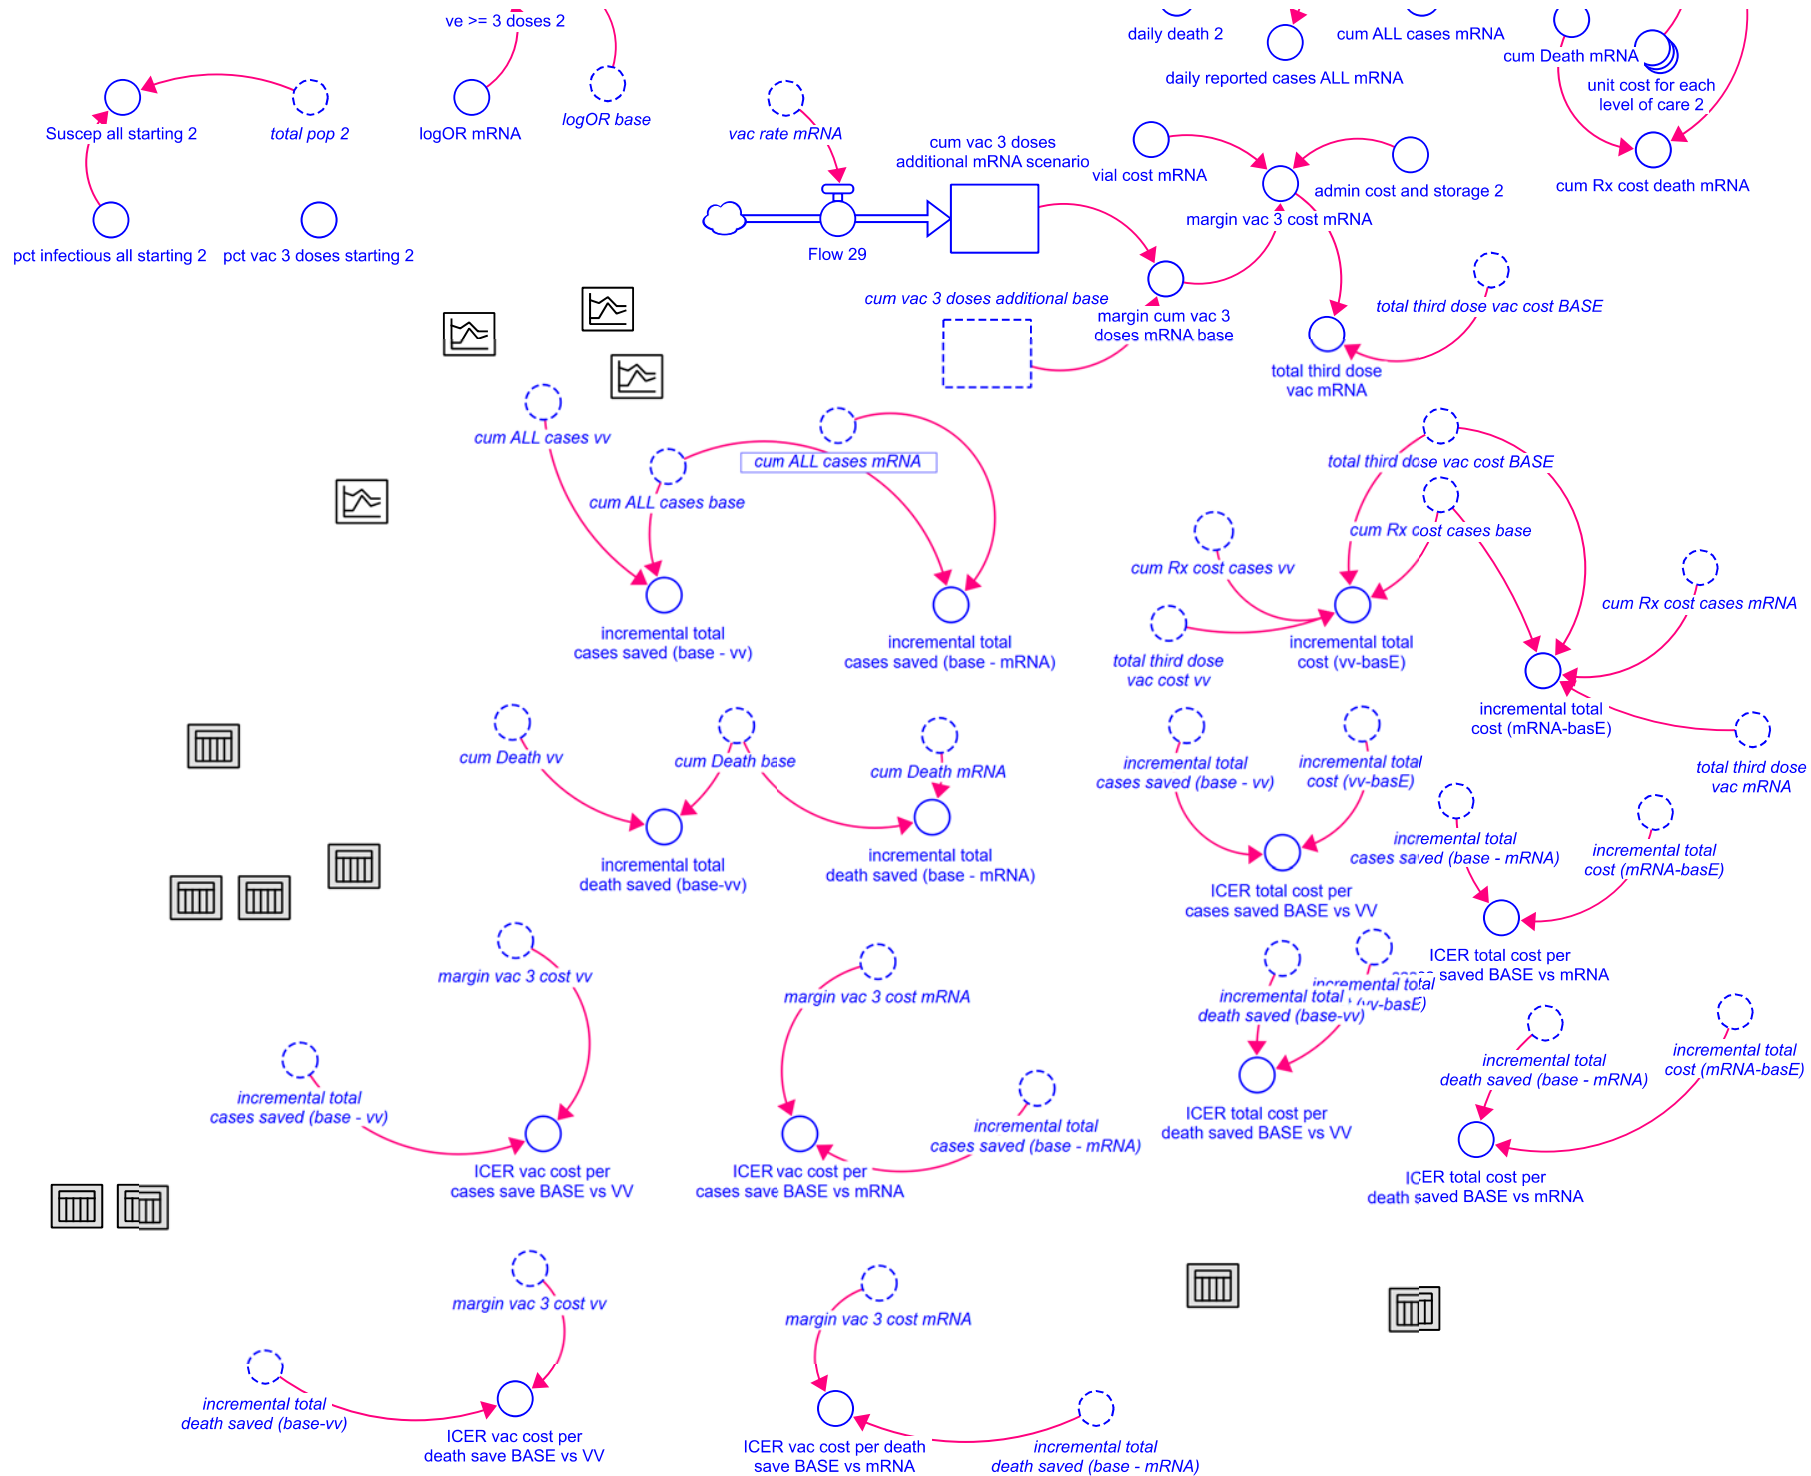

Supplement: s1 [file s1]
